# Supplementary material for: Near-Complete SARS-CoV-2 Seroprevalence among Rural and Urban Kenyans despite Significant Vaccine Hesitancy and Refusal
Source: Vaccines (Basel). 2022 Dec 28;11(1):68. doi: 10.3390/vaccines11010068 (PMC9862465; doi:10.3390/vaccines11010068)
Supplement: Supplementary file 1 [file vaccines-11-00068-s001.zip › vaccines-2028304-supplementary.pdf]

Table S1: Study Questionnaire

|                                      |                                              |                                          |
|--------------------------------------|----------------------------------------------|------------------------------------------|
| <b>A1. Household ID (From list):</b> | <b>Household Head Contacts:</b>              | <b>A2. Date of interview: (dd/mm/yy)</b> |
| <b>A3. Enumerator initials:</b>      | <b>A4. County:</b><br><b>A5. Sub-county:</b> |                                          |
| <b>A6. HH geographic coordinates</b> |                                              |                                          |

**SECTION B. HOUSEHOLD DEMOGRAPHICS ALL HOUSEHOLD MEMBERS CURRENTLY LIVING WITHIN LAST WEEK**

| <b>B1. Household Member No.</b> | <b>B2. Position in the Household (in relation to the household head)</b>                                                                                                                                      | <b>B3. Age (years)</b> | <b>B4. Age in months (If less than 1 year)</b> | <b>B5. Sex</b>     | <b>B6. Highest level of formal education completed</b>                                              | <b>B7. Primary occupation (Pick one)</b>                                                                                                                   |
|---------------------------------|---------------------------------------------------------------------------------------------------------------------------------------------------------------------------------------------------------------|------------------------|------------------------------------------------|--------------------|-----------------------------------------------------------------------------------------------------|------------------------------------------------------------------------------------------------------------------------------------------------------------|
|                                 |                                                                                                                                                                                                               |                        |                                                |                    |                                                                                                     |                                                                                                                                                            |
|                                 |                                                                                                                                                                                                               |                        |                                                |                    |                                                                                                     |                                                                                                                                                            |
|                                 |                                                                                                                                                                                                               |                        |                                                |                    |                                                                                                     |                                                                                                                                                            |
|                                 |                                                                                                                                                                                                               |                        |                                                |                    |                                                                                                     |                                                                                                                                                            |
|                                 | 1=Household Head<br>2=Spouse of Household Head<br>3=Son/Daughter<br>4=Sibling<br>5=Father/Mother<br>6=Nephew/niece<br>7=Grand (son/daughter)<br>8=Herdsman/woman<br>9= House help<br>10=Other (Specify above) | (Years)                | Months                                         | 1=Male<br>2=Female | 0= Child<br>1=No formal education<br>2 = Primary<br>3 = Secondary<br>4 = Postsecondary<br>5 = Other | 1. Student<br>2. Farmer<br>3. Business Owner<br>4. Civil servant<br>5. Health care worker<br>6. Skilled Worker<br>7. Unskilled laborer<br>8. Not disclosed |

**B8. Relation of the person interviewed to the household head:**

- ☐ Household head     
 ☐ Spouse     
 ☐ Son/Daughter     
 ☐ Other Relative  
☐ Caretaker

## INDIVIDUAL SECTION

### SECTION C: RESPIRATORY ILLNESS AND MEDICAL HISTORY

C1. In the last 14 days have you had a respiratory illness with (cough or sore throat or running nose)? ☐ Yes ☐ No ☐ Unknown

C2 Do you currently having any of the following symptoms (cough or sore throat or running nose)?

☐ Yes ☐ No

IF YES TO ANY OF THE SYMPTOMS, AN NP/OP SWABS WILL BE COLLECTED FROM THE PARTICIPANT

C3 Have you had any of these symptoms in the last 14 days (check all that apply)

| Symptom                                              | No. of Days since onset |                          |
|------------------------------------------------------|-------------------------|--------------------------|
| <input type="checkbox"/> Fever (or history of fever) | _____                   | <input type="checkbox"/> |
| <input type="checkbox"/> Cough                       | _____                   |                          |
| Sore throat                                          | _____                   |                          |
| <input type="checkbox"/> Running nose                | _____                   |                          |

☐ Chills \_\_\_\_\_

☐ Fatigue \_\_\_\_\_

☐ Muscle ache (myalgia) \_\_\_\_\_

☐ Shortness of breath (dyspnea) \_\_\_\_\_

☐ Wheezing \_\_\_\_\_

☐ Chest pain \_\_\_\_\_

☐ Headache \_\_\_\_\_

☐ Nausea/vomiting \_\_\_\_\_

☐ other (specify) \_\_\_\_\_

C4. In the last 14 days have you been unable to perform daily chores because of a respiratory illness?

☐ Yes ☐ No ☐ Can't remember

C5. If yes, estimated # days \_\_\_\_\_

C6. In the last 14 days has anyone in your household been ill with a respiratory illness (running nose and cough or sore throat)? ☐ Yes ☐ No ☐ Unknown

C7. If yes, number of household members with respiratory illness in the last 14 days

☐ 1 ☐ 2 ☐ 3 ☐ 4 ☐  $\geq 5$

C8. In the last 14 days has anyone in your household been hospitalized due to respiratory illness?

☐ Yes ☐ No

C9. In the last 14 days has anyone at work been ill with a respiratory illness (fever and cough or sore throat)? ☐ Yes ☐ No ☐ Unknown ☐ Don't work away from home

C10. In the last 14 days has anyone at work been hospitalized due to respiratory illness? ☐ Yes ☐ No ☐ Unknown

C11. Since the beginning of this year, have you had a respiratory illness? ☐ Yes ☐ No ☐ Unknown

### Medical and smoking history

C12. Do you have a medical history of any chronic breathing problems, such as asthma, coughing? ☐ Yes ☐ No ☐ Unknown

C13. Do you have a medical history of heart disease, hypertension, or stroke? ☐ Yes ☐ No ☐ Unknown

C14. Do you have a medical history of any other chronic medical problems, such as diabetes, cancer, liver disease, kidney disease, tuberculosis? ☐ Yes ☐ No ☐ Unknown

C 15. Have you ever been diagnosed with COVID-19 since the pandemic started? ☐ Yes ☐ No

C 16. Has any member of your household ever been diagnosed with COVID-19? ☐ Yes ☐ No

C 17. Has any one of your relatives ever been diagnosed with COVID-? ☐ Yes ☐ No ☐ Don't Know

C 18. Has any one of your friends or neighbors been diagnosed with COVID-? ☐ Yes ☐ No ☐ Don't know

### SECTION D: COVID-19 KNOWLEDGE, ATTITUDES AND PRACTICES

D1. Do you think that people who show no symptoms of being sick, such as coughing or sneezing, can spread a virus / contagious disease? ☐ Yes ☐ No

D2. Do you think it may be possible that a person can get a virus / contagious by touching a surface or object that has the virus on it? ☐ Yes ☐ No

D3. Do you have a surgical or a homemade cloth mask that you use to cover your mouth or nose when you leave your house? ☐ Yes ☐ No

D4. In the past 7 days, have you worn it every time you left your house? ☐ Yes ☐ No

D5. For how many days, have you stayed at home all day, without going out at all and without receiving any visits? \_\_\_\_\_

D6. Why did you stay at home all day? **[DO NOT READ OUT OPTIONS - SELECT ALL THAT APPLY]**

- ☐ There was a mandatory lockdown
- ☐ It was recommended by the government / local authority
- ☐ It was recommended by health experts
- ☐ I was asked to stay at home by a family member, friend, or other acquaintance
- ☐ I was worried about getting infected
- ☐ I was worried about spreading the virus
- ☐ There was no work
- ☐ Worked from home
- ☐ None of the above

D7. In the past 7 days, did you attend social gatherings (e.g., visit family and friends, drink tea at a stall, etc.) ☐ Yes ☐ No

D8. In the past 7 days, did you cover your mouth and nose with your bent elbow when you coughed or sneezed? ☐ Yes ☐ No

D9. In the past 7 days, did you leave your home to do some work? ☐ Yes ☐ No

## **SECTION E: COVID-19 VACCINE KNOWLEDGE AND ATTITUDES**

### **COVID-19 Vaccine knowledge**

E1. Are you aware of the COVID-19 vaccine? Yes No

E2. If yes to E1,

E2a. What was the source of your COVID-19 vaccine related information?

☐ social media ☐ Mass media ☐ Health care workers ☐ Friends/family/neighbors

E2b. Who do you trust the most for information about vaccines?

- ☐ Media (TV, Radio, Newspaper)
- ☐ Internet
- ☐ Social media (Facebook, Twitter, WhatsApp, .etc.)
- ☐ Health care providers: Physicians, pharmacists, etc.
- ☐ Family-members
- ☐ Government (JFDA)
- ☐ The pharmaceutical company reports
- ☐ Scientific articles
- ☐ I do not trust any source

**E2c. How is the vaccine administered?**

☐ Via injection ☐ Orally ☐ Other routes

E2d. Do you know how many doses of the vaccine does one require? ☐ Yes ☐ No

☐ Don't know

For E2e-E2h, tick appropriate responses.

E2e. COVID-19 vaccine protects the receiver from getting infection.

☐ Yes ☐ No ☐ Don't know

E2f. COVID-19 vaccine may protect other people who do not receive the vaccine.

☐ Yes ☐ No ☐ Don't know

E2g. Everyone including children can receive the vaccine. ☐ Yes ☐ No ☐ Don't know

E2h. COVID-19 vaccines do not have side effects. ☐ yes ☐ No ☐ Don't know

### COVID-19 Vaccine Attitudes

E3. Kindly indicate the extent to which you agree or disagree with each of the following statements.

| Statement                                                                | Strongly disagree        | Disagree                 | Neutral                  | Strongly agree           | Agree                    |
|--------------------------------------------------------------------------|--------------------------|--------------------------|--------------------------|--------------------------|--------------------------|
| It is important to get a vaccine to protect the people from COVID-19     | <input type="checkbox"/> |
| The government should make the vaccine available for all citizens.       | <input type="checkbox"/> |
| I am willing to pay for the COVID-19 vaccine privately                   | <input type="checkbox"/> |
| I trust in the information provided by media about the COVID-19 vaccine. | <input type="checkbox"/> |

### **COVID-19 vaccine acceptance**

E3. Have you been vaccinated against COVID-19? ☐ Yes ☐ No

E4. If yes,

How many doses of the vaccine have you received? ☐ 1 ☐ 2

E5 Which vaccine did you receive?

- ☐ AstraZeneca  
☐ Pfizer  
☐ Moderna  
☐ Johnson and Johnson  
☐ Sinopharm  
☐ Don't know

E6. If 1 dose, do you plan on receiving your second dose? ☐ Yes ☐ No

Proof of vaccination available. ☐ Text message from MOH ☐ Vaccination certificate  
☐ Others ☐ Proof not available

E7. What factors influence your decision to take the vaccine?

☐ Number of confirmed cases ☐ Suggestions from doctors/Ministry of Health  
☐ Number of COVID-19 related deaths ☐ Suggestions from family/friends/neighbors  
☐ Health status ☐ Type of vaccine  
☐ Age ☐ Number of doses  
☐ Vaccine effectiveness ☐ Country that produces the vaccine  
☐ Vaccine available for free ☐ Others(specify)

If no to Qs E3, would you receive the COVID-19 vaccine if offered to you? ☐ Yes ☐ No

If no, why would you not receive the vaccine?

☐ lack of information regarding the vaccine ☐ vaccine can cause COVID-19  
☐ side effects ☐ Religious reasons  
☐ safety concerns ☐ Cultural reasons  
☐ effectiveness concerns ☐ Others(specify)

## SECTION F: LABORATORY INFORMATION

F1. Was a specimen collected? 1=Yes 2=No

If no, reason?

.....

F3. Date(s) of specimen collection: .....

F4. Specimen type: NP Swab OP Swab Serum

Table S2: Factors associated with COVID-19 vaccine uptake on univariable analysis

| Characteristic | Nairobi (Urban) n=326 |                  |                     |         | Kakamega (Rural) n=262 |                  |                     |         |
|----------------|-----------------------|------------------|---------------------|---------|------------------------|------------------|---------------------|---------|
|                | Vaccinated            | PRR <sup>1</sup> | 95% CI <sup>1</sup> | p-value | Vaccinated             | PRR <sup>1</sup> | 95% CI <sup>1</sup> | p-value |
| Sex            |                       |                  |                     |         |                        |                  |                     |         |
| Female         | 214                   | —                | —                   |         | 166                    | —                | —                   |         |
| Male           | 112                   | 1.10             | 0.87, 1.37          | 0.43    | 96                     | 1.10             | 0.85, 1.41          | 0.46    |
| Age group      |                       |                  |                     |         |                        |                  |                     |         |
| 18-30          | 103                   | —                | —                   |         | 51                     | —                | —                   |         |
| 31-40          | 101                   | 1.41             | 1.07, 1.85          | 0.015   | 60                     | 1.35             | 0.93, 1.96          | 0.12    |
| 41-50          | 56                    | 1.66             | 1.19, 2.29          | 0.002   | 56                     | 1.65             | 1.13, 2.41          | 0.010   |
| 51-60          | 39                    | 1.48             | 1.01, 2.12          | 0.037   | 39                     | 1.46             | 0.96, 2.21          | 0.075   |

| Characteristic                 | Nairobi (Urban) n=326 |                  |                     |         | Kakamega (Rural) n=262 |                  |                     |         |
|--------------------------------|-----------------------|------------------|---------------------|---------|------------------------|------------------|---------------------|---------|
|                                | Vaccinated            | PRR <sup>1</sup> | 95% CI <sup>1</sup> | p-value | Vaccinated             | PRR <sup>1</sup> | 95% CI <sup>1</sup> | p-value |
| 61+                            | 27                    | 1.55             | 0.99, 2.33          | 0.043   | 56                     | 1.29             | 0.88, 1.89          | 0.18    |
| Age in years                   | 326                   | 1.01             | 1.00, 1.02          | 0.002   | 262                    | 1.00             | 1.00, 1.01          | 0.43    |
| Level of education             |                       |                  |                     |         |                        |                  |                     |         |
| No formal education            | 11                    | —                | —                   |         | 72                     | —                | —                   |         |
| Primary                        | 95                    | 1.03             | 0.58, 2.05          | 0.91    | 102                    | 1.28             | 0.95, 1.74          | 0.11    |
| Secondary                      | 110                   | 1.25             | 0.70, 2.46          | 0.48    | 66                     | 1.28             | 0.92, 1.79          | 0.15    |
| Post-secondary                 | 109                   | 1.54             | 0.87, 3.04          | 0.17    | 21                     | 1.35             | 0.81, 2.15          | 0.23    |
| Main Occupation                |                       |                  |                     |         |                        |                  |                     |         |
| Unemployed                     | 78                    | —                | —                   |         | 45                     | —                | —                   |         |
| Self Employed                  | 89                    | 1.28             | 0.95, 1.74          | 0.11    | 160                    | 1.69             | 1.23, 2.38          | 0.002   |
| Employed                       | 28                    | 1.80             | 1.15, 2.74          | 0.007   | 17                     | 2.18             | 1.21, 3.74          | 0.006   |
| Student                        | 21                    | 1.11             | 0.67, 1.76          | 0.68    | 17                     | 2.00             | 1.11, 3.42          | 0.015   |
| Informal Employment            | 99                    | 1.23             | 0.91, 1.66          | 0.17    | 21                     | 1.29             | 0.75, 2.13          | 0.34    |
| Health care worker             | 10                    | 2.32             | 1.13, 4.27          | 0.012   | 1                      | 1.41             | 0.08, 6.45          | 0.73    |
| History of chronic illness     |                       |                  |                     |         |                        |                  |                     |         |
| Any chronic illness            |                       |                  |                     |         |                        |                  |                     |         |
| No                             | 267                   | —                | —                   |         | 219                    | —                | —                   |         |
| Yes                            | 59                    | 1.08             | 0.80, 1.41          | 0.61    | 43                     | 0.96             | 0.68, 1.31          | 0.79    |
| Chronic breathing problems     |                       |                  |                     |         |                        |                  |                     |         |
| No                             | 312                   | —                | —                   |         | 244                    | —                | —                   |         |
| Yes                            | 14                    | 0.78             | 0.43, 1.27          | 0.35    | 2                      | 0.76             | 0.13, 2.36          | 0.70    |
| Unknown                        |                       |                  |                     |         | 16                     | 1.17             | 0.67, 1.87          | 0.55    |
| Hypertension                   |                       |                  |                     |         |                        |                  |                     |         |
| No                             | 284                   | —                | —                   |         | 230                    | —                | —                   |         |
| Yes                            | 41                    | 1.25             | 0.89, 1.72          | 0.18    | 30                     | 0.86             | 0.57, 1.23          | 0.43    |
| Unknown                        | 1                     | 0.65             | 0.04, 2.88          | 0.67    | 2                      | 0.46             | 0.08, 1.43          | 0.27    |
| Diagnosed with COVID-19        |                       |                  |                     |         |                        |                  |                     |         |
| No                             | 291                   | —                | —                   |         | 261                    | —                | —                   |         |
| Yes                            | 35                    | 1.66             | 1.15, 2.32          | 0.005   | 1                      | 1.89             | 0.11, 8.35          | 0.53    |
| Source of COVID-19 information |                       |                  |                     |         |                        |                  |                     |         |

| Nairobi (Urban) n=326                  |            |                  |                     |         | Kakamega (Rural) n=262 |                  |                     |         |
|----------------------------------------|------------|------------------|---------------------|---------|------------------------|------------------|---------------------|---------|
| Characteristic                         | Vaccinated | PRR <sup>1</sup> | 95% CI <sup>1</sup> | p-value | Vaccinated             | PRR <sup>1</sup> | 95% CI <sup>1</sup> | p-value |
| Social media                           |            |                  |                     |         |                        |                  |                     |         |
| No                                     | 207        | —                | —                   |         | 180                    | —                | —                   |         |
| Yes                                    | 118        | 1.28             | 1.02, 1.61          | 0.031   | 82                     | 0.96             | 0.73, 1.24          | 0.75    |
| Mass media                             |            |                  |                     |         |                        |                  |                     |         |
| No                                     | 102        | —                | —                   |         | 60                     | —                | —                   |         |
| Yes                                    | 223        | 0.87             | 0.69, 1.10          | 0.24    | 202                    | 1.15             | 0.87, 1.54          | 0.35    |
| Health care workers                    |            |                  |                     |         |                        |                  |                     |         |
| No                                     | 218        | —                | —                   |         | 147                    | —                | —                   |         |
| Yes                                    | 107        | 1.11             | 0.87, 1.39          | 0.40    | 115                    | 1.05             | 0.82, 1.33          | 0.71    |
| Family/friends/neighbors               |            |                  |                     |         |                        |                  |                     |         |
| No                                     | 249        | —                | —                   |         | 190                    | —                | —                   |         |
| Yes                                    | 76         | 0.91             | 0.70, 1.17          | 0.46    | 72                     | 0.89             | 0.68, 1.17          | 0.42    |
| Church                                 |            |                  |                     |         |                        |                  |                     |         |
| No                                     | 301        | —                | —                   |         | 191                    | —                | —                   |         |
| Yes                                    | 24         | 1.02             | 0.66, 1.51          | 0.92    | 71                     | 0.93             | 0.71, 1.22          | 0.61    |
| Others                                 |            |                  |                     |         |                        |                  |                     |         |
| No                                     | 305        | —                | —                   |         | 255                    | —                | —                   |         |
| Yes                                    | 20         | 1.11             | 0.68, 1.69          | 0.66    | 7                      | 1.18             | 0.50, 2.31          | 0.67    |
| Trusted source of COVID-19 information |            |                  |                     |         |                        |                  |                     |         |
| Mass media                             | 105        | —                | —                   | —       | 191                    | —                | —                   |         |
| Social media                           | 18         | 1.02             | 0.60, 1.64          | 0.94    | 3                      | 1.14             | 0.28, 2.98          | 0.83    |
| Health Care providers                  | 115        | 1.13             | 0.87, 1.47          | 0.37    | 44                     | 1.14             | 0.81, 1.57          | 0.43    |
| Family-members                         | 4          | 0.53             | 0.16, 1.26          | 0.21    | 1                      | 0.38             | 0.02, 1.68          | 0.33    |
| I do not trust any source              | 5          | 0.40             | 0.14, 0.87          | 0.043   | 2                      | 1.90             | 0.31, 5.91          | 0.37    |
| Government                             | 66         | 1.22             | 0.89, 1.66          | 0.20    | 18                     | 1.07             | 0.63, 1.68          | 0.80    |
| Others                                 | 8          | 1.32             | 0.59, 2.54          | 0.45    | 1                      | 0.63             | 0.04, 2.80          | 0.65    |
| COVID-19 vaccine knowledge             |            |                  |                     |         |                        |                  |                     |         |
| Vaccine protects against infection     |            |                  |                     |         |                        |                  |                     |         |
| No/Don't know                          | 87         | —                | —                   |         | 57                     | —                | —                   |         |
| Yes                                    | 236        | 1.16             | 0.91, 1.49          | 0.24    | 205                    | 1.23             | 0.92, 1.66          | 0.17    |
| Vaccine protects the unvaccinated      |            |                  |                     |         |                        |                  |                     |         |

[illegible]

Table S3: factors associated with COVID-19 vaccine refusal on univariable analysis

| Characteristic | Urban n=122 |                  |                     |         | Rural n=77 |                  |                     |         |
|----------------|-------------|------------------|---------------------|---------|------------|------------------|---------------------|---------|
|                | Refusal     | PRR <sup>1</sup> | 95% CI <sup>1</sup> | p-value | Refusal    | PRR <sup>1</sup> | 95% CI <sup>1</sup> | p-value |
| sex            |             |                  |                     |         |            |                  |                     |         |
| Female         | 83          | —                | —                   |         | 56         | —                | —                   |         |
| Male           | 39          | 1.09             | 0.73, 1.58          | 0.67    | 21         | 0.80             | 0.47, 1.29          | 0.37    |
| Age group      |             |                  |                     |         |            |                  |                     |         |
| 18-30          | 61          | —                | —                   |         | 21         | —                | —                   |         |
| 31-40          | 38          | 1.23             | 0.81, 1.83          | 0.32    | 19         | 1.36             | 0.72, 2.53          | 0.33    |
| 41-50          | 7           | 0.65             | 0.27, 1.32          | 0.27    | 7          | 0.89             | 0.35, 2.00          | 0.80    |
| 51-60          | 12          | 1.15             | 0.59, 2.06          | 0.66    | 9          | 1.19             | 0.52, 2.52          | 0.66    |

| Characteristic                 | Urban n=122 |                  |                     |         | Rural n=77 |                  |                     |              |
|--------------------------------|-------------|------------------|---------------------|---------|------------|------------------|---------------------|--------------|
|                                | Refusal     | PRR <sup>1</sup> | 95% CI <sup>1</sup> | p-value | Refusal    | PRR <sup>1</sup> | 95% CI <sup>1</sup> | p-value      |
| 61+                            | 4           | 0.62             | 0.19, 1.51          | 0.36    | 21         | 1.47             | 0.80, 2.71          | 0.21         |
| Age in years                   | 122         | 1.00             | 0.98, 1.01          | 0.53    | 77         | 1.01             | 1.00, 1.02          | 0.15         |
| Level of education             |             |                  |                     |         |            |                  |                     |              |
| No formal education            | 6           | —                | —                   |         | 38         | —                | —                   |              |
| Primary                        | 46          | 0.94             | 0.44, 2.46          | 0.89    | 21         | 0.65             | 0.37, 1.09          | 0.11         |
| Secondary                      | 36          | 0.91             | 0.41, 2.40          | 0.83    | 13         | 0.62             | 0.32, 1.13          | 0.13         |
| Post-secondary                 | 33          | 1.40             | 0.63, 3.71          | 0.45    | 5          | 0.85             | 0.29, 1.96          | 0.72         |
| Main Occupation                |             |                  |                     |         |            |                  |                     |              |
| Unemployed                     | 39          | —                | —                   |         | 32         | —                | —                   |              |
| Self Employed                  | 32          | 1.14             | 0.71, 1.82          | 0.58    | 35         | 0.84             | 0.52, 1.35          | 0.47         |
| Employed                       | 4           | 1.32             | 0.40, 3.28          | 0.60    | 2          | 1.03             | 0.25, 4.28          | 0.97         |
| Student                        | 15          | 1.72             | 0.92, 3.06          | 0.074   | 4          | 1.46             | 0.52, 4.14          | 0.47         |
| Informal Employment            | 31          | 0.93             | 0.58, 1.49          | 0.76    | 2          | 0.20             | 0.05, 0.86          | <b>0.030</b> |
| Health care worker             | 0           | 0                | 0                   | 0       | 0          | 0.00             | 0.00, Inf           | >0.99        |
| History of chronic illness     |             |                  |                     |         |            |                  |                     |              |
| Any chronic illness            |             |                  |                     |         |            |                  |                     |              |
| No                             | 103         | —                | —                   |         | 59         | —                | —                   |              |
| Yes                            | 19          | 0.96             | 0.57, 1.53          | 0.87    | 18         | 1.41             | 0.81, 2.35          | 0.20         |
| Chronic breathing problems     |             |                  |                     |         |            |                  |                     |              |
| No                             | 110         | —                | —                   |         | 69         | —                | —                   |              |
| Yes                            | 12          | 1.52             | 0.79, 2.64          | 0.17    | 7          | 2.21             | 0.92, 4.48          | 0.045        |
| Unknown                        |             |                  |                     |         | 1          | 1.05             | 0.06, 4.75          | 0.96         |
| Hypertension                   |             |                  |                     |         |            |                  |                     |              |
| No                             | 116         | —                | —                   |         | 60         | —                | —                   |              |
| Yes                            | 5           | 0.49             | 0.17, 1.08          | 0.12    | 14         | 1.31             | 0.70, 2.27          | 0.36         |
| Unknown                        | 1           | 1.17             | 0.07, 5.23          | 0.87    | 3          | 1.59             | 0.39, 4.29          | 0.43         |
| Diagnosed with COVID-19        |             |                  |                     |         |            |                  |                     |              |
| No                             | 117         | —                | —                   |         | 0          | NA               |                     |              |
| Yes                            | 5           | 1.55             | 0.55, 3.41          | 0.34    | 0          | NA               |                     |              |
| Source of COVID-19 information |             |                  |                     |         |            |                  |                     |              |
| Social media                   |             |                  |                     |         |            |                  |                     |              |
| No                             | 84          | —                | —                   |         | 48         | —                | —                   |              |

| Urban n=122                            |         |                  |                     |         | Rural n=77 |                  |                     |         |
|----------------------------------------|---------|------------------|---------------------|---------|------------|------------------|---------------------|---------|
| Characteristic                         | Refusal | PRR <sup>1</sup> | 95% CI <sup>1</sup> | p-value | Refusal    | PRR <sup>1</sup> | 95% CI <sup>1</sup> | p-value |
| Yes                                    | 29      | 1.06             | 0.68, 1.60          | 0.79    | 26         | 1.08             | 0.66, 1.73          | 0.74    |
| Mass media                             |         |                  |                     |         |            |                  |                     |         |
| No                                     | 30      | —                | —                   |         | 25         | —                | —                   |         |
| Yes                                    | 83      | 0.92             | 0.61, 1.42          | 0.69    | 49         | 0.78             | 0.48, 1.28          | 0.30    |
| Health care workers                    |         |                  |                     |         |            |                  |                     |         |
| No                                     | 89      | —                | —                   |         | 52         | —                | —                   |         |
| Yes                                    | 24      | 0.69             | 0.43, 1.07          | 0.11    | 22         | 0.60             | 0.36, 0.97          | 0.043   |
| Family/friends/neighbors               |         |                  |                     |         |            |                  |                     |         |
| No                                     | 79      | —                | —                   |         | 51         | —                | —                   |         |
| Yes                                    | 34      | 1.16             | 0.77, 1.72          | 0.46    | 23         | 0.94             | 0.56, 1.52          | 0.80    |
| Church                                 |         |                  |                     |         |            |                  |                     |         |
| No                                     | 104     | —                | —                   |         | 51         | —                | —                   |         |
| Yes                                    | 9       | 1.15             | 0.54, 2.14          | 0.69    | 23         | 1.04             | 0.63, 1.69          | 0.87    |
| Others                                 |         |                  |                     |         |            |                  |                     |         |
| No                                     | 107     | —                | —                   |         | 71         | —                | —                   |         |
| Yes                                    | 6       | 1.09             | 0.42, 2.26          | 0.85    | 3          | 2.30             | 0.56, 6.17          | 0.16    |
| Trusted source of COVID-19 information |         |                  |                     |         |            |                  |                     |         |
| Mass media                             | 36      | —                | —                   | —       | 59         | —                | —                   |         |
| Social media                           | 9       | 1.51             | 0.68, 3.01          | 0.27    | 0          | 0.00             | 0.00, Inf           | 0.99    |
| Health Care providers                  | 31      | 1.00             | 0.61, 1.61          | 0.99    | 7          | 0.70             | 0.32, 1.53          | 0.37    |
| Family-members                         | 6       | 1.56             | 0.59, 3.44          | 0.31    | 3          | 2.17             | 0.68, 6.93          | 0.19    |
| I do not trust any source              | 15      | 2.15             | 1.14, 3.84          | 0.013   | 2          | 1.90             | 0.31, 5.91          | 0.37    |
| Government                             | 15      | 1.05             | 0.56, 1.87          | 0.88    | 3          | 0.62             | 0.19, 1.98          | 0.42    |
| Others                                 | 1       | 0.72             | 0.04, 3.30          | 0.74    | 2          | 2.90             | 0.71, 11.9          | 0.14    |
| COVID-19 knowledge                     |         |                  |                     |         |            |                  |                     |         |
| Vaccine protects against infection     |         |                  |                     |         |            |                  |                     |         |
| No/Don't know                          | 52      | —                | —                   |         | 32         | —                | —                   |         |
| Yes                                    | 59      | 0.58             | 0.40, 0.85          | 0.005   | 42         | 0.56             | 0.35, 0.89          | 0.012   |
| Vaccine protects the unvaccinated      |         |                  |                     |         |            |                  |                     |         |
| Yes                                    | 37      | —                | —                   |         | 22         | —                | —                   |         |
| No/ Don't know                         | 76      | 1.43             | 0.97, 2.14          | 0.074   | 52         | 1.28             | 0.79, 2.15          | 0.33    |
| Children can be vaccinated             |         |                  |                     |         |            |                  |                     |         |

[illegible]
